# Supplementary material
Source: PubMed Central journal article supplement (PMC4205268)
Supplement: NIHMS626465-supplement-01.pdf [file NIHMS626465-supplement-01.pdf]

## Supplementary Table 1

### Antibody List

| Antibody          | Clone          |
|-------------------|----------------|
| Anti-CD4          | RM4-5          |
| Anti-CD8          | 5H10           |
| Anti-TCR $\beta$  | H57-597        |
| Anti-CD44         | IM7            |
| Anti-CD62L        | MEL-14         |
| Anti-CD25         | PC61           |
| Anti-CD27         | A7R34          |
| Anti-Foxp3        | FJK-16s        |
| Anti-CTLA-4       | UC10-4B9       |
| Anti-CD39         | 24-DMS1        |
| Anti-CD73         | TY/11.8        |
| Anti-Ki67         | SolA15         |
| Anti-CD103        | 2E7            |
| Anti-KLRG1        | 2F1            |
| Anti-CCR6         | 11A9           |
| Anti-CXCR3        | CXCR3-173      |
| Anti-GITR         | DTA-1          |
| Anti-IRF4         | 3E4            |
| Anti-Egr2         | Erongr2        |
| Anti-CD11a        | 2D7            |
| Anti-CD11a        | M17/4          |
| Anti-IFN $\gamma$ | XMG1.2         |
| Anti-IL4          | 11B11          |
| Anti-IL13         | eBio13A        |
| Anti-IL5          | BD Biosciences |
| Anti-IL2          | JES6-5H4       |
